# Supplementary material
Source: publisher figshare collection journal article supplement (https://acs.figshare.com/ndownloader/files/4616842)
Supplement: Supplementary file 1 [file 4616842]

Table 2. Fatty acid composition of rabbit feeds (mg of fatty acid/100 g of feed) used in the experimental design (n=36) <sup>a</sup>.

|                                  | Added fat |                      |       |                      |       |
|----------------------------------|-----------|----------------------|-------|----------------------|-------|
|                                  | 3% BT     | 1.5% SO +<br>1.5% BT | 3% SO | 1.5% LO +<br>1.5% BT | 3% LO |
| C12:0                            | 3.4       | 5.0                  | 2.3   | 2.9                  | 3.6   |
| C14:0                            | 56        | 37                   | 6.7   | 34                   | 6.2   |
| C15:0                            | 10.4      | 8.1                  | 3.7   | 7.3                  | 3.8   |
| C16:0iso                         | 2.7       | 4.3                  | N.D.  | 4.1                  | N.D.  |
| C16:0                            | 580       | 500                  | 310   | 450                  | 280   |
| C17:0                            | 21.8      | 14.8                 | 3.4   | 13.6                 | 3.7   |
| C18:0                            | 370       | 280                  | 117   | 250                  | 88    |
| C20:0                            | 7.8       | 10.4                 | 11.6  | 8.2                  | 8.0   |
| C22:0                            | 5.0       | 13.2                 | 20.5  | 6.2                  | 7.5   |
| C24:0                            | 6.6       | 9.8                  | 12.2  | 7.4                  | 8.6   |
| SFA                              | 1060      | 880                  | 490   | 780                  | 410   |
| C16:1n-9                         | 6.5       | 5.1                  | 2.7   | 4.9                  | 3.0   |
| C18:1n-9                         | 660       | 660                  | 550   | 580                  | 470   |
| C20:1n-9                         | 8.5       | 9.0                  | 8.2   | 8.8                  | 8.8   |
| C24:1n-9                         | 0.99      | 1.57                 | 1.26  | 1.22                 | 1.09  |
| C16:1n-7                         | 41        | 26                   | 4.5   | 25                   | 4.0   |
| C18:1n-7                         | 36        | 32                   | 23    | 27                   | 23    |
| MUFA                             | 750       | 730                  | 590   | 650                  | 510   |
| C18:2n-6                         | 500       | 1200                 | 1800  | 630                  | 740   |
| C18:3n-6                         | 0.65      | 0.37                 | N.D.  | N.D.                 | N.D.  |
| C20:2n-6                         | 3.00      | 3.53                 | 2.21  | 2.22                 | 2.56  |
| C20:3n-6                         | 0.96      | 0.71                 | 0.14  | 0.62                 | N.D.  |
| C20:4n-6                         | 3.74      | 4.0                  | 3.2   | 3.7                  | 3.6   |
| n-6 PUFA <sup>b</sup>            | 510       | 1210                 | 1810  | 640                  | 750   |
| C18:3n-3                         | 91        | 103                  | 100   | 603                  | 1190  |
| C18:4n-3                         | 0.51      | 0.33                 | N.D.  | 0.30                 | N.D.  |
| C20:3n-3                         | 1.24      | 0.52                 | N.D.  | 1.25                 | 2.45  |
| n-3 PUFA <sup>b</sup>            | 93        | 104                  | 100   | 605                  | 1190  |
| total PUFA                       | 600       | 1300                 | 1910  | 1240                 | 1940  |
| 9 <i>t</i> ,12 <i>t</i> -18:2    | 2.22      | 2.04                 | 0.98  | 1.55                 | 0.83  |
| 9 <i>c</i> ,12 <i>t</i> -18:2    | 3.40      | 3.22                 | 2.70  | 2.71                 | 1.94  |
| 9 <i>t</i> ,12 <i>c</i> -18:2    | 1.29      | 0.92                 | N.D.  | 0.94                 | N.D.  |
| total <i>trans</i> 18:2          | 7.0       | 6.3                  | 3.7   | 5.3                  | 2.7   |
| 9 <i>c</i> ,11 <i>t</i> -CLA     | 3.74      | 3.39                 | 0.93  | 2.21                 | 0.44  |
| 10 <i>t</i> ,12 <i>c</i> -CLA    | 0.66      | 0.59                 | 0.45  | 0.49                 | 0.36  |
| <i>ditrans</i> -CLA <sup>c</sup> | 2.17      | 1.77                 | 0.90  | 1.75                 | 1.02  |
| total CLAs                       | 6.6       | 5.8                  | 2.2   | 4.4                  | 1.8   |
| <i>trans</i> 18:1                | 130       | 77                   | 1.4   | 70                   | 2.1   |
| total <i>trans</i> FA            | 144       | 91                   | 7.4   | 79.7                 | 6.6   |
| Ratio n-6/n-3                    | 5.3       | 11.6                 | 18.2  | 1.1                  | 0.6   |

Abbreviations used: BT = beef tallow; SO = sunflower oil; LO = linseed oil; FA = fatty acids; SFA = saturated fatty acids; MUFA = monounsaturated fatty acids; PUFA = polyunsaturated fatty acids; CLA = conjugated linoleic acid; N.D. = not detected.

<sup>a</sup> Feeds were formulated according to a factorial design (2x3x2): 2 vegetable fat sources were used to replace BT in feeds, one rich in n-6 fatty acids (SO) and another rich in n-3 fatty acids (LO); 3 doses of vegetable fat source [0%, 1.5% or 3% (w/w) of fat supplementation; in all treatments total added fat was completed up to 3% (w/w) with BT]; and  $\alpha$ -tocopheryl acetate ( $\alpha$ TA) (0 or 100 mg/kg of feed). Feed analysis were conducted in triplicate (n=36).

<sup>b</sup> 22:4n-6, 22:5n-6, 20:5n-3, 22:5n-3 and 22:6n-3 were not detected in feeds.

<sup>c</sup> *Ditrans*-CLA: mixture of isomers.

Table 3. Fatty acid composition,  $\alpha$ -tocopherol content, TBA and lipid hydroperoxide values in raw rabbit meat depending on the dose and source of vegetable fat used to replace beef tallow in feeds, and on dietary supplementation with  $\alpha$ -tocopheryl acetate.

|                                            | Dose of vegetable fat <sup>a</sup> |         |        | Source of fat |        | $\alpha$ TA |           |
|--------------------------------------------|------------------------------------|---------|--------|---------------|--------|-------------|-----------|
|                                            | 0%                                 | 1.5%    | 3%     | SO            | LO     | 0 mg/kg     | 100 mg/kg |
| FA composition <sup>b</sup>                |                                    |         |        |               |        |             |           |
| C10:0                                      | 6.1                                | 5.8     | 6.1    | 5.9           | 6.2    | 6.1         | 5.9       |
| C12:0                                      | 6.4                                | 6.1     | 6.3    | 6.2           | 6.4    | 6.3         | 6.2       |
| C14:0                                      | 56 z                               | 46 y    | 36 x   | 45            | 47     | 46          | 46        |
| C15:0                                      | 15.0 y                             | 14.1 xy | 13.1 x | 14.0          | 14.1   | 14.2        | 13.8      |
| C16:0iso                                   | 6.9 y                              | 6.6 y   | 6.0 x  | 6.4           | 6.5    | 6.5         | 6.5       |
| C16:0                                      | 540 y                              | 510 xy  | 460 x  | 490           | 510    | 510         | 500       |
| C17:0                                      | 17.6 y                             | 16.8 y  | 14.7 x | 16.2          | 16.5   | 16.3        | 16.4      |
| C18:0                                      | 196 y                              | 193 y   | 173 x  | 185           | 190    | 188         | 189       |
| C20:0 <sup>c</sup>                         | 2.13                               | 2.20    | 1.98   | 2.17          | 2.02   | 2.17        | 2.08      |
| C24:0                                      | 0.41 x                             | 0.51 y  | 0.63 z | 0.50          | 0.52   | 0.54        | 0.49      |
| SFA                                        | 850 y                              | 790 xy  | 720 x  | 770           | 800    | 790         | 780       |
| C16:1n-9                                   | 11.4 z                             | 10.0 y  | 8.9 x  | 10.1          | 10.2   | 10.2        | 10.2      |
| C18:1n-9                                   | 600 z                              | 500 y   | 450 x  | 510           | 530    | 520         | 510       |
| C20:1n-9                                   | 8.0 z                              | 6.1 y   | 5.0 x  | 6.5           | 6.2    | 6.4         | 6.3       |
| C24:1n-9                                   | 0.53 xy                            | 0.64 y  | 0.48 x | 0.48 x        | 0.62 y | 0.54        | 0.56      |
| C16:1n-7                                   | 64 y                               | 50 x    | 42 x   | 50            | 54     | 54          | 50        |
| C18:1n-7                                   | 35 z                               | 29 y    | 24 x   | 28            | 30     | 29          | 29        |
| MUFA                                       | 720 z                              | 600 y   | 530 x  | 600           | 630    | 620         | 610       |
| C18:2n-6 <sup>c</sup>                      | 410 x                              | 540 y   | 690 z  | 640 y         | 460 x  | 550         | 550       |
| C18:3n-6 <sup>cd</sup>                     | 1.4 x                              | 1.5 x   | 1.9 y  | 1.6           | 1.6    | 1.6         | 1.6       |
| C20:2n-6 <sup>c</sup>                      | 6.1 x                              | 6.8 x   | 8.6 y  | 8.5 y         | 5.9 x  | 7.3         | 7.1       |
| C20:3n-6 <sup>c</sup>                      | 4.3 x                              | 4.7 y   | 5.1 z  | 5.0 y         | 4.5 x  | 4.6         | 4.8       |
| C20:4n-6 <sup>c</sup>                      | 35 x                               | 39 y    | 40 y   | 40 y          | 35 x   | 37 x        | 39 y      |
| C22:4n-6 <sup>c</sup>                      | 10.7                               | 11.2    | 11.3   | 13.8 y        | 8.4 x  | 11.0        | 11.1      |
| C22:5n-6 <sup>c</sup>                      | 3.9 x                              | 4.5 y   | 4.7 y  | 4.9 y         | 3.8 x  | 4.3         | 4.5       |
| n-6 PUFA <sup>c</sup>                      | 470 x                              | 610 y   | 760 z  | 710 y         | 520 x  | 620         | 610       |
| C18:3n-3 <sup>cde</sup>                    | 51 x                               | 151 y   | 250 z  | 49 x          | 250 y  | 150         | 150       |
| C18:4n-3 <sup>cd</sup>                     | 0.44 x                             | 0.57 y  | 0.66 z | 0.40 x        | 0.72 y | 0.56        | 0.56      |
| C20:3n-3 <sup>c</sup>                      | 1.7 x                              | 3.7 y   | 5.4 z  | 1.3 x         | 5.9 y  | 3.7         | 3.5       |
| C20:5n-3 <sup>cdf</sup>                    | 1.4 x                              | 3.0 y   | 4.4 z  | 1.1 x         | 4.9 y  | 2.8 x       | 3.1 y     |
| C22:5n-3 <sup>cdf</sup>                    | 7.7 x                              | 13.6 y  | 16.7 z | 6.8 x         | 18.5 y | 12.1 x      | 13.2 y    |
| C22:6n-3 <sup>cf</sup>                     | 2.1 x                              | 2.7 y   | 3.2 z  | 1.9 x         | 3.4 y  | 2.5 x       | 2.7 y     |
| n-3 PUFA <sup>cde</sup>                    | 65 x                               | 174 y   | 283 c  | 60 x          | 285 y  | 176         | 172       |
| total PUFA                                 | 540 x                              | 780 y   | 1040 z | 770           | 800    | 790         | 780       |
| 9 <i>t</i> ,12 <i>t</i> -18:2              | 2.8 z                              | 2.5 y   | 2.3 x  | 2.5           | 2.6    | 2.6         | 2.5       |
| 9 <i>c</i> ,12 <i>t</i> -18:2              | 2.7 z                              | 2.2 y   | 1.8 x  | 2.2           | 2.2    | 2.2         | 2.2       |
| 9 <i>t</i> ,12 <i>c</i> -18:2 <sup>c</sup> | 1.36 z                             | 1.07 y  | 0.83 x | 1.03 x        | 1.14 y | 1.09        | 1.08      |
| total <i>trans</i> 18:2                    | 6.9 z                              | 5.8 y   | 4.9 x  | 5.8           | 6.0    | 5.9         | 5.8       |

|                                           |        |         |        |        |       |        |        |
|-------------------------------------------|--------|---------|--------|--------|-------|--------|--------|
| 9 <i>c</i> ,11 <i>t</i> -CLA              | 2.51 z | 1.60 y  | 0.95 x | 1.67   | 1.65  | 1.63   | 1.69   |
| 10 <i>t</i> ,12 <i>c</i> -CLA             | 0.39 z | 0.29 y  | 0.06 x | 0.27   | 0.23  | 0.25   | 0.25   |
| <i>ditrans</i> -CLA <sup>g</sup>          | 0.92 z | 0.74 y  | 0.52 x | 0.72   | 0.74  | 0.75   | 0.70   |
| total CLAs                                | 3.8 z  | 2.6 y   | 1.5 x  | 2.7    | 2.6   | 2.6    | 2.6    |
| <i>trans</i> 18:1                         | 39 z   | 26 y    | 7.1 x  | 24     | 24    | 24     | 25     |
| total <i>trans</i> FA                     | 50 z   | 34 y    | 14 x   | 32     | 33    | 32     | 33     |
| Ratio PUFA/SFA                            | 0.6 x  | 1.0 y   | 1.5 z  | 1.0    | 1.0   | 1.0    | 1.0    |
| Ratio n-6/n-3 <sup>ce</sup>               | 7.4 y  | 6.9 x   | 9.0 z  | 12.1 y | 3.4 x | 7.7    | 7.8    |
| $\alpha$ -tocopherol content <sup>b</sup> | 3.05   | 2.95    | 2.77   | 3.03   | 2.82  | 1.39 x | 4.46 y |
| LHP value <sup>b</sup>                    | 0.51 x | 0.73 xy | 0.81 y | 0.65   | 0.71  | 0.71 x | 0.56 y |
| TBA value <sup>bcd</sup>                  | 28 x   | 29 x    | 52 y   | 30 x   | 43 y  | 41 y   | 31 x   |

Abbreviations used: SO = sunflower oil; LO = linseed oil;  $\alpha$ TA =  $\alpha$ -tocopheryl acetate; FA = fatty acids; SFA = saturated fatty acids; MUFA = monounsaturated fatty acids; PUFA = polyunsaturated fatty acids; CLA = conjugated linoleic acid; LHP = lipid hydroperoxides; TBA = thiobarbituric acid; N.D. = not detected.

<sup>a</sup> Vegetable fat (sunflower or linseed oil) was added to feeds at 0, 1.5 and 3% (w/w). Total added fat was completed up to 3% (w/w) with animal fat (beef tallow).

<sup>b</sup> Fatty acid composition expressed as mg FA/100 g meat;  $\alpha$ -tocopherol content expressed as mg  $\alpha$ -tocopherol/kg meat; LHP value expressed as mmol CHPeq/kg meat; TBA value expressed as  $\mu$ g malondialdehyde/kg meat.

<sup>c</sup> Interaction between dose of fat x source of fat significant at  $P \leq 0.05$ . P values were obtained from multifactor ANOVA, n=48.

<sup>d</sup> Interaction between dose of fat x source of fat x  $\alpha$ TA supplementation significant at  $P \leq 0.05$ . P values obtained from multifactor ANOVA, n=48.

<sup>e</sup> Interaction between dose of fat x  $\alpha$ TA supplementation significant at  $P \leq 0.05$ . P values were obtained from multifactor ANOVA, n=48.

<sup>f</sup> Interaction between source of fat x  $\alpha$ TA supplementation significant at  $P \leq 0.05$ .

P values were obtained from multifactor ANOVA, n=48.

<sup>g</sup> *Ditrans*-CLA: mixture of isomers.

x,y,z Values in the same row for a certain factor bearing no common letters are statistically different ( $P \leq 0.05$ ). P values were obtained from multifactor ANOVA, n=48. Letters were obtained by means of the Scheffé's test ( $\alpha=0.05$ ).

Table 6. Changes in fatty acid composition,  $\alpha$ -tocopherol content and TBA value after cooking and refrigeration of cooked rabbit meat.

|                             |                               | Raw meat | Cooked meat | Refrigerated cooked meat |
|-----------------------------|-------------------------------|----------|-------------|--------------------------|
| FA composition <sup>a</sup> | C10:0                         | 6.0      | 5.8         | 6.0                      |
|                             | C12:0                         | 6.3      | 6.2         | 6.3                      |
|                             | C14:0                         | 46       | 46          | 48                       |
|                             | C15:0                         | 14.0     | 14.1        | 14.3                     |
|                             | C16:0iso                      | 6.5      | 6.4         | 6.5                      |
|                             | C16:0                         | 500      | 510         | 520                      |
|                             | C17:0                         | 16.4     | 16.5        | 16.6                     |
|                             | C18:0                         | 187      | 191         | 195                      |
|                             | C20:0                         | 2.10     | 2.25        | 2.20                     |
|                             | C24:0                         | 0.51 x   | 0.75 z      | 0.63 y                   |
|                             | SFA                           | 790      | 800         | 820                      |
|                             | C16:1n-9                      | 10.1     | 10.4        | 10.6                     |
|                             | C18:1n-9                      | 520      | 530         | 530                      |
|                             | C20:1n-9                      | 6.4      | 6.5         | 6.5                      |
|                             | C22:1n-9                      | N.D. x   | 0.57 y      | 0.41 y                   |
|                             | C24:1n-9                      | 0.55 x   | 0.68 y      | 0.63 z                   |
|                             | C16:1n-7                      | 52       | 52          | 52                       |
|                             | C18:1n-7                      | 29       | 30          | 30                       |
|                             | MUFA                          | 620      | 630         | 630                      |
|                             | C18:2n-6                      | 550      | 550         | 550                      |
|                             | C18:3n-6                      | 1.59     | 1.55        | 1.56                     |
|                             | C20:2n-6                      | 7.2      | 7.1         | 7.3                      |
|                             | C20:3n-6                      | 4.7      | 4.6         | 4.8                      |
|                             | C20:4n-6                      | 38 y     | 34 x        | 36 xy                    |
|                             | C22:4n-6                      | 11.1 y   | 10.3 x      | 11.0 xy                  |
|                             | C22:5n-6                      | 4.4 y    | 3.8 x       | 4.2 x                    |
|                             | n-6 PUFA                      | 620      | 610         | 620                      |
|                             | C18:3n-3                      | 150      | 140         | 140                      |
|                             | C18:4n-3                      | 0.56 y   | 0.52 x      | 0.53 xy                  |
|                             | C20:3n-3                      | 3.61     | 3.29        | 3.40                     |
|                             | C20:5n-3 <sup>b</sup>         | 2.97 y   | 2.69 x      | 2.62 x                   |
|                             | C22:5n-3 <sup>b</sup>         | 12.7 y   | 11.0 x      | 11.5 x                   |
|                             | C22:6n-3 <sup>b</sup>         | 2.66 y   | 2.34 x      | 2.48 x                   |
|                             | n-3 PUFA                      | 170 y    | 160 x       | 160 x                    |
|                             | total PUFA                    | 790      | 770         | 780                      |
|                             | 9 <i>t</i> ,12 <i>t</i> -18:2 | 2.55 x   | 2.67 y      | 2.88 z                   |
|                             | 9 <i>c</i> ,12 <i>t</i> -18:2 | 2.22 x   | 2.34 y      | 2.51 z                   |
|                             | 9 <i>t</i> ,12 <i>c</i> -18:2 | 1.09 x   | 1.21 y      | 1.30 y                   |
|                             | total <i>trans</i> 18:2       | 5.9 x    | 6.2 x       | 6.7 y                    |
|                             | 9 <i>c</i> ,11 <i>t</i> -CLA  | 1.66 y   | 1.42 x      | 1.46 x                   |
|                             | 10 <i>t</i> ,12 <i>c</i> -CLA | 0.25 x   | 0.30 y      | 0.30 y                   |
|                             | <i>ditrans</i> CLA            | 0.73 x   | 1.31 y      | 1.02 y                   |
|                             | total CLAs                    | 2.6      | 3.0         | 2.8                      |

|                                              |                       |        |        |        |
|----------------------------------------------|-----------------------|--------|--------|--------|
|                                              | <i>Ctrans</i> 18:1    | 24     | 25     | 26     |
|                                              | total <i>trans</i> FA | 33     | 34     | 35     |
|                                              | Ratio n-6/n-3         | 7.8    | 7.9    | 7.8    |
| $\alpha$ -tocopherol<br>content <sup>a</sup> |                       | 2.93 x | 2.68 y | 2.45 z |
| TBA value <sup>abcdef</sup>                  |                       | 36 x   | 108 y  | 656 z  |

Abbreviations used: FA = fatty acids; SFA = Saturated fatty acids; MUFA = Monounsaturated fatty acids; PUFA = Polyunsaturated fatty acids; CLA = Conjugated linoleic acid;

<sup>a</sup> Fatty acid composition expressed as mg FA/100 g meat;  $\alpha$ -tocopherol content expressed as mg  $\alpha$ -tocopherol/ kg meat; LHP content expressed as mmol CHPEq/ kg meat; TBA value expressed as  $\mu$ g MDA/ kg meat.

<sup>b</sup> Interaction of cooking x source of fat significant at  $P \leq 0.05$ . P values were obtained from multifactor ANOVA, n=84.

<sup>c</sup> Interaction of cooking x  $\alpha$ TA supplementation significant at  $P \leq 0.05$ . P values were obtained from multifactor ANOVA, n=84.

<sup>d</sup> Interaction of cooking x dose of fat significant at  $P \leq 0.05$ . P values were obtained from multifactor ANOVA, n=84.

<sup>e</sup> Interaction of cooking x dose x source of fat significant at  $P \leq 0.05$ . P values were obtained from multifactor ANOVA, n=84.

<sup>f</sup> Interaction of refrigeration x source of fat significant at  $P \leq 0.05$ . P values were obtained from multifactor ANOVA, n=74.

x,y,z Values in the same row for a certain factor bearing no common letters are statistically different ( $P \leq 0.05$ ). P values were obtained from multifactor ANOVA, n=84 for the effect of cooking (raw vs. cooked meat) and n=72 for the

refrigeration effect (cooked vs. refrigerated cooked meat). Letters were obtained by means of the Scheffé's test ( $\alpha=0.05$ ).
